# Supplementary material for: Similar Arbuscular Mycorrhizal Fungal Communities in 31 Durum Wheat Cultivars (Triticum turgidum L. var. durum) Under Field Conditions in Eastern Canada
Source: PubMed Central journal article supplement (PMC7431883; doi:10.3389/fpls.2020.01206), 2020-08-11
Supplement: DataSheet_1.pdf [file DataSheet_1.pdf]

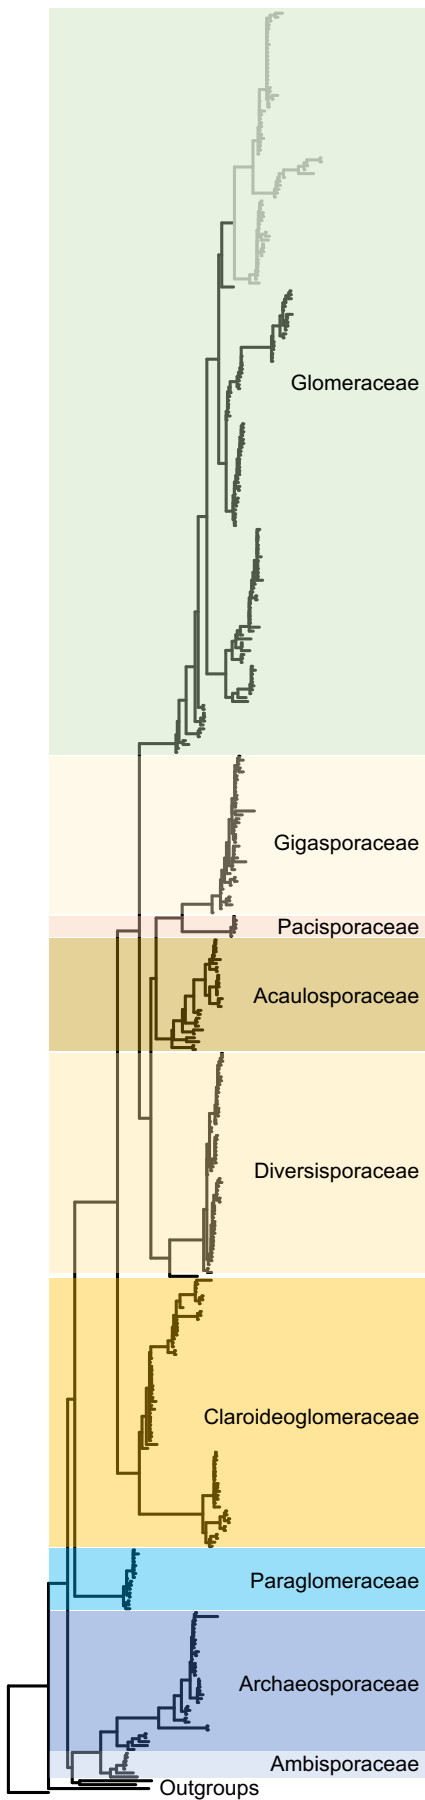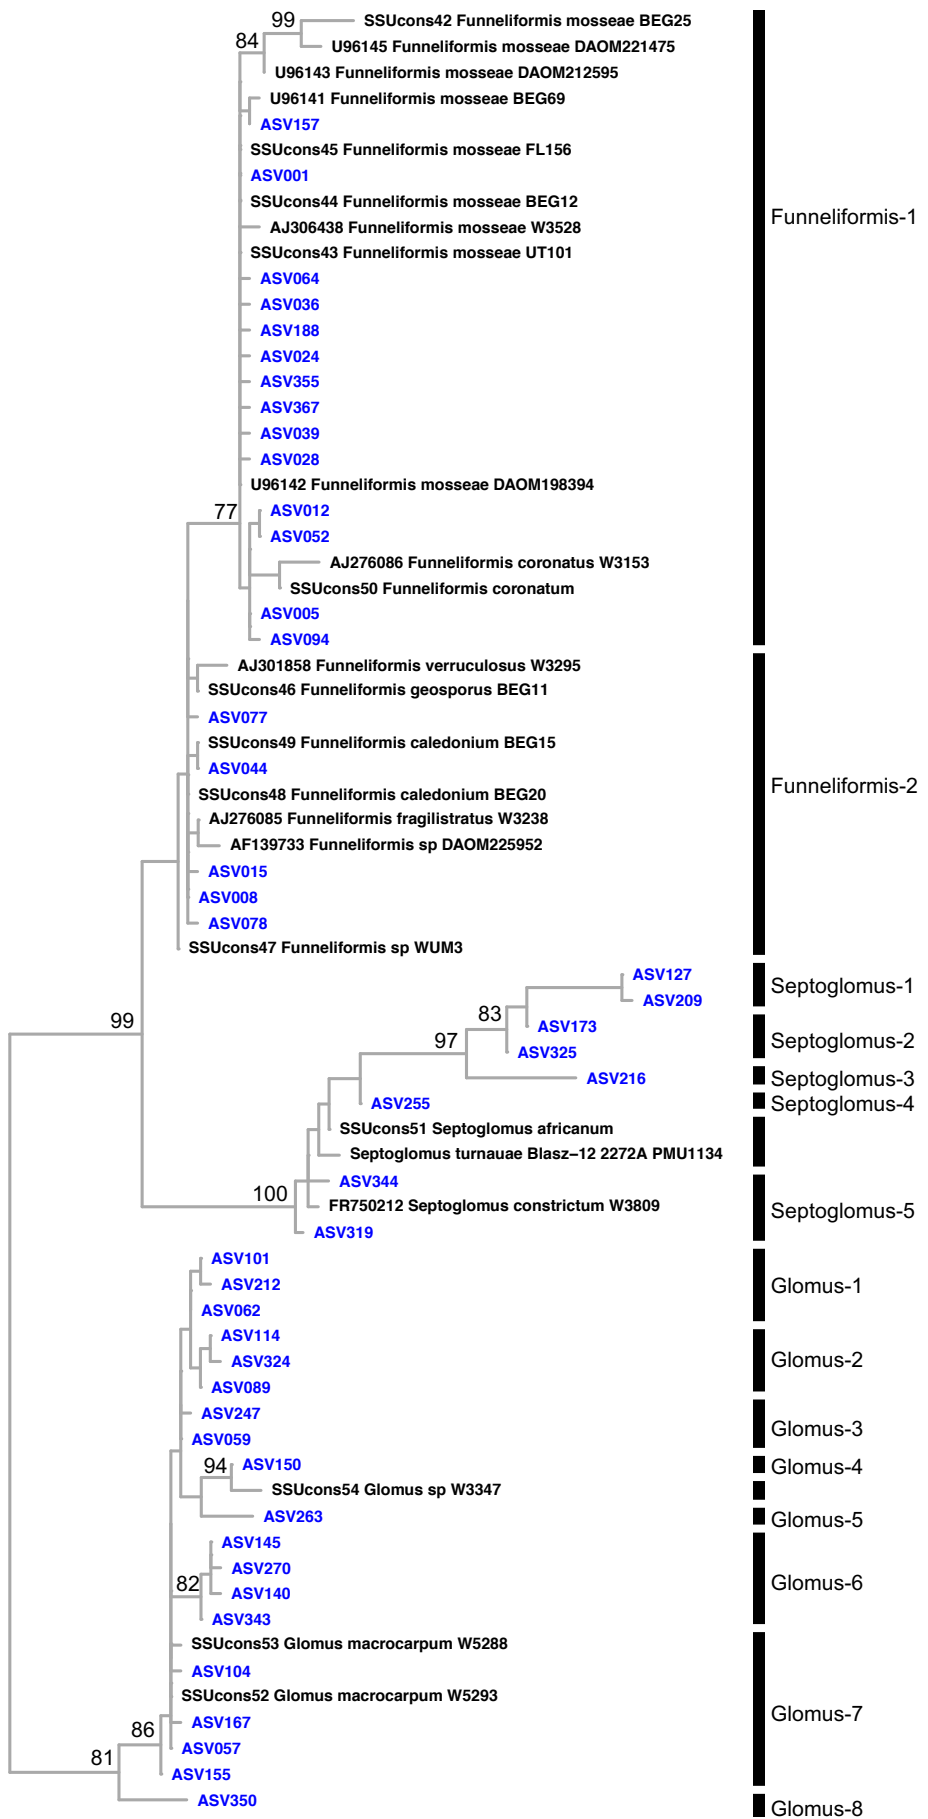

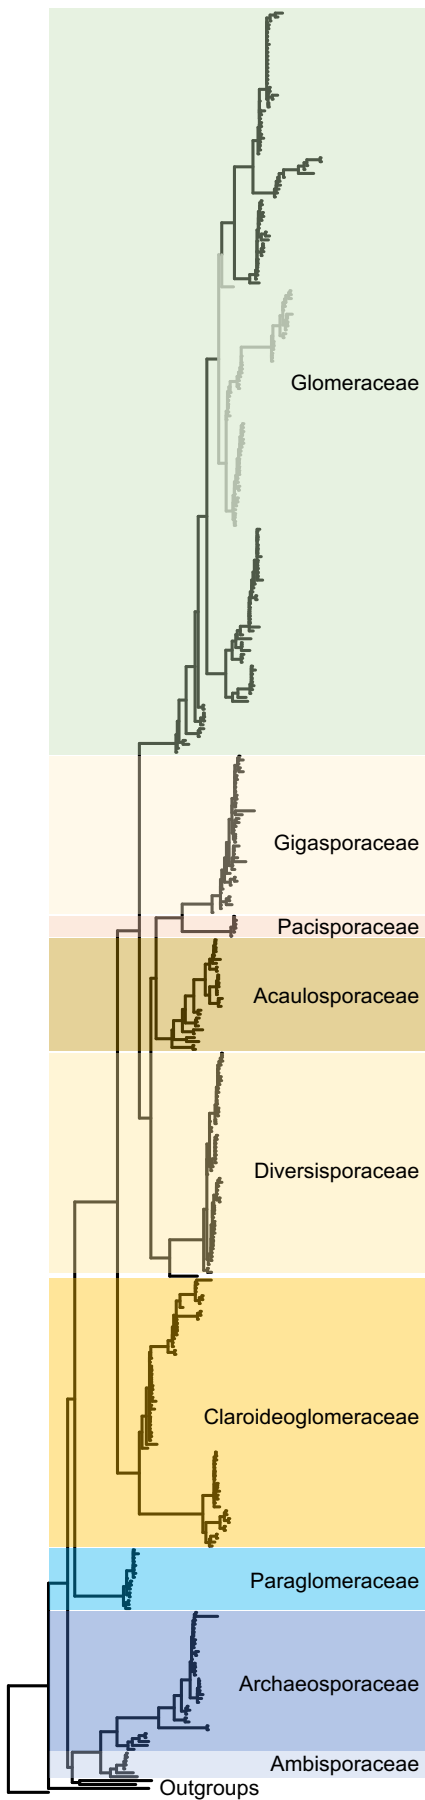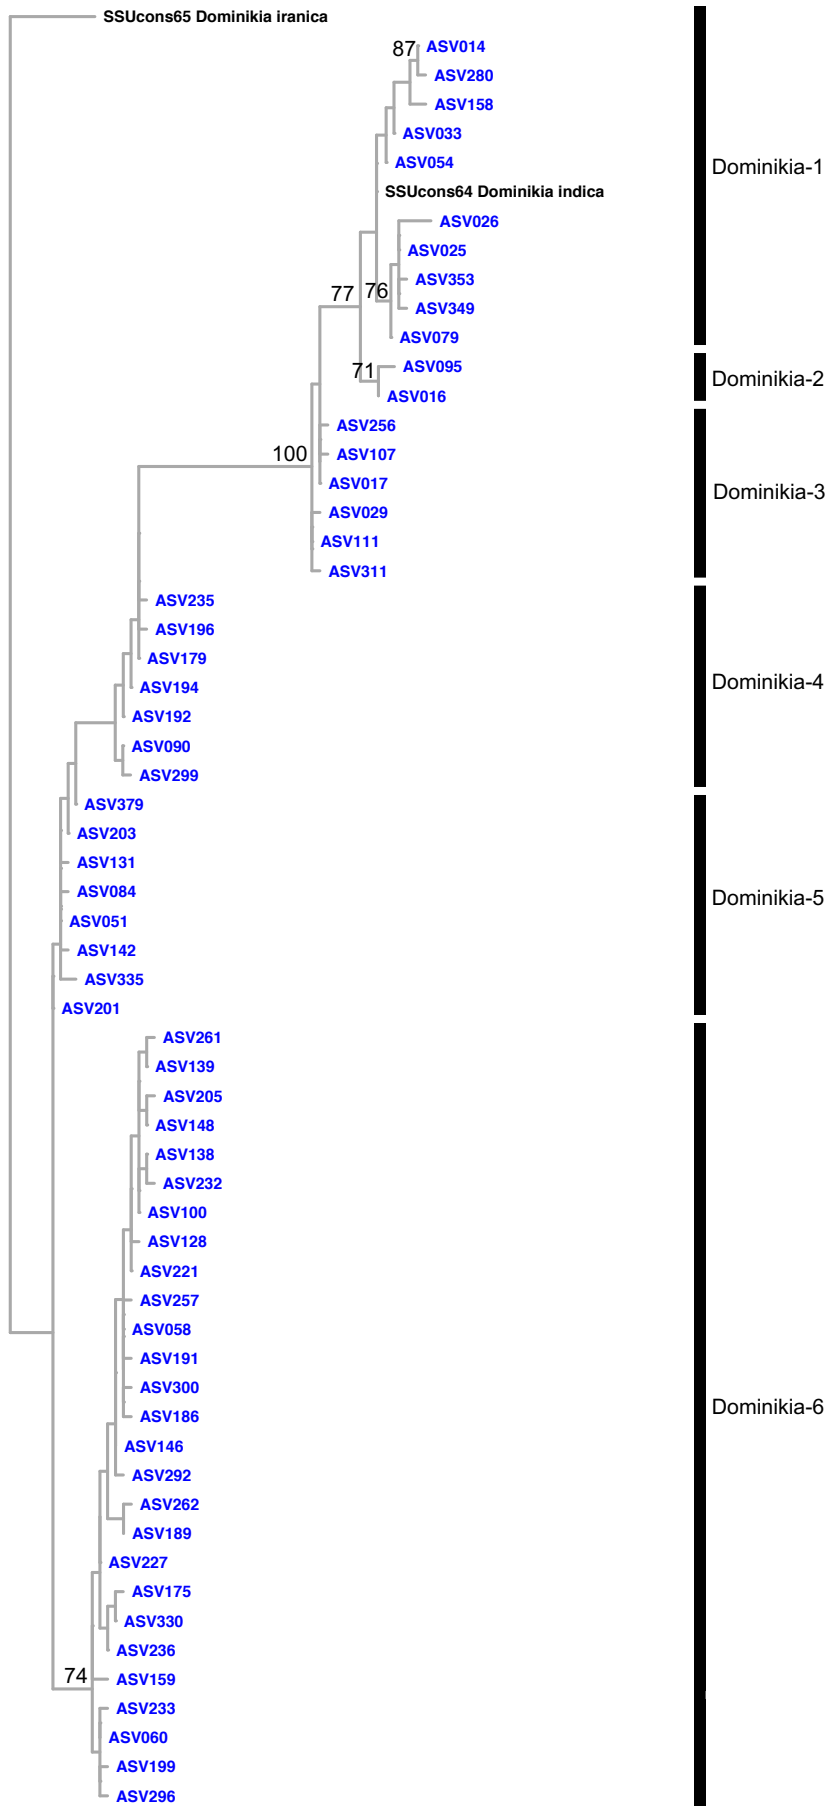

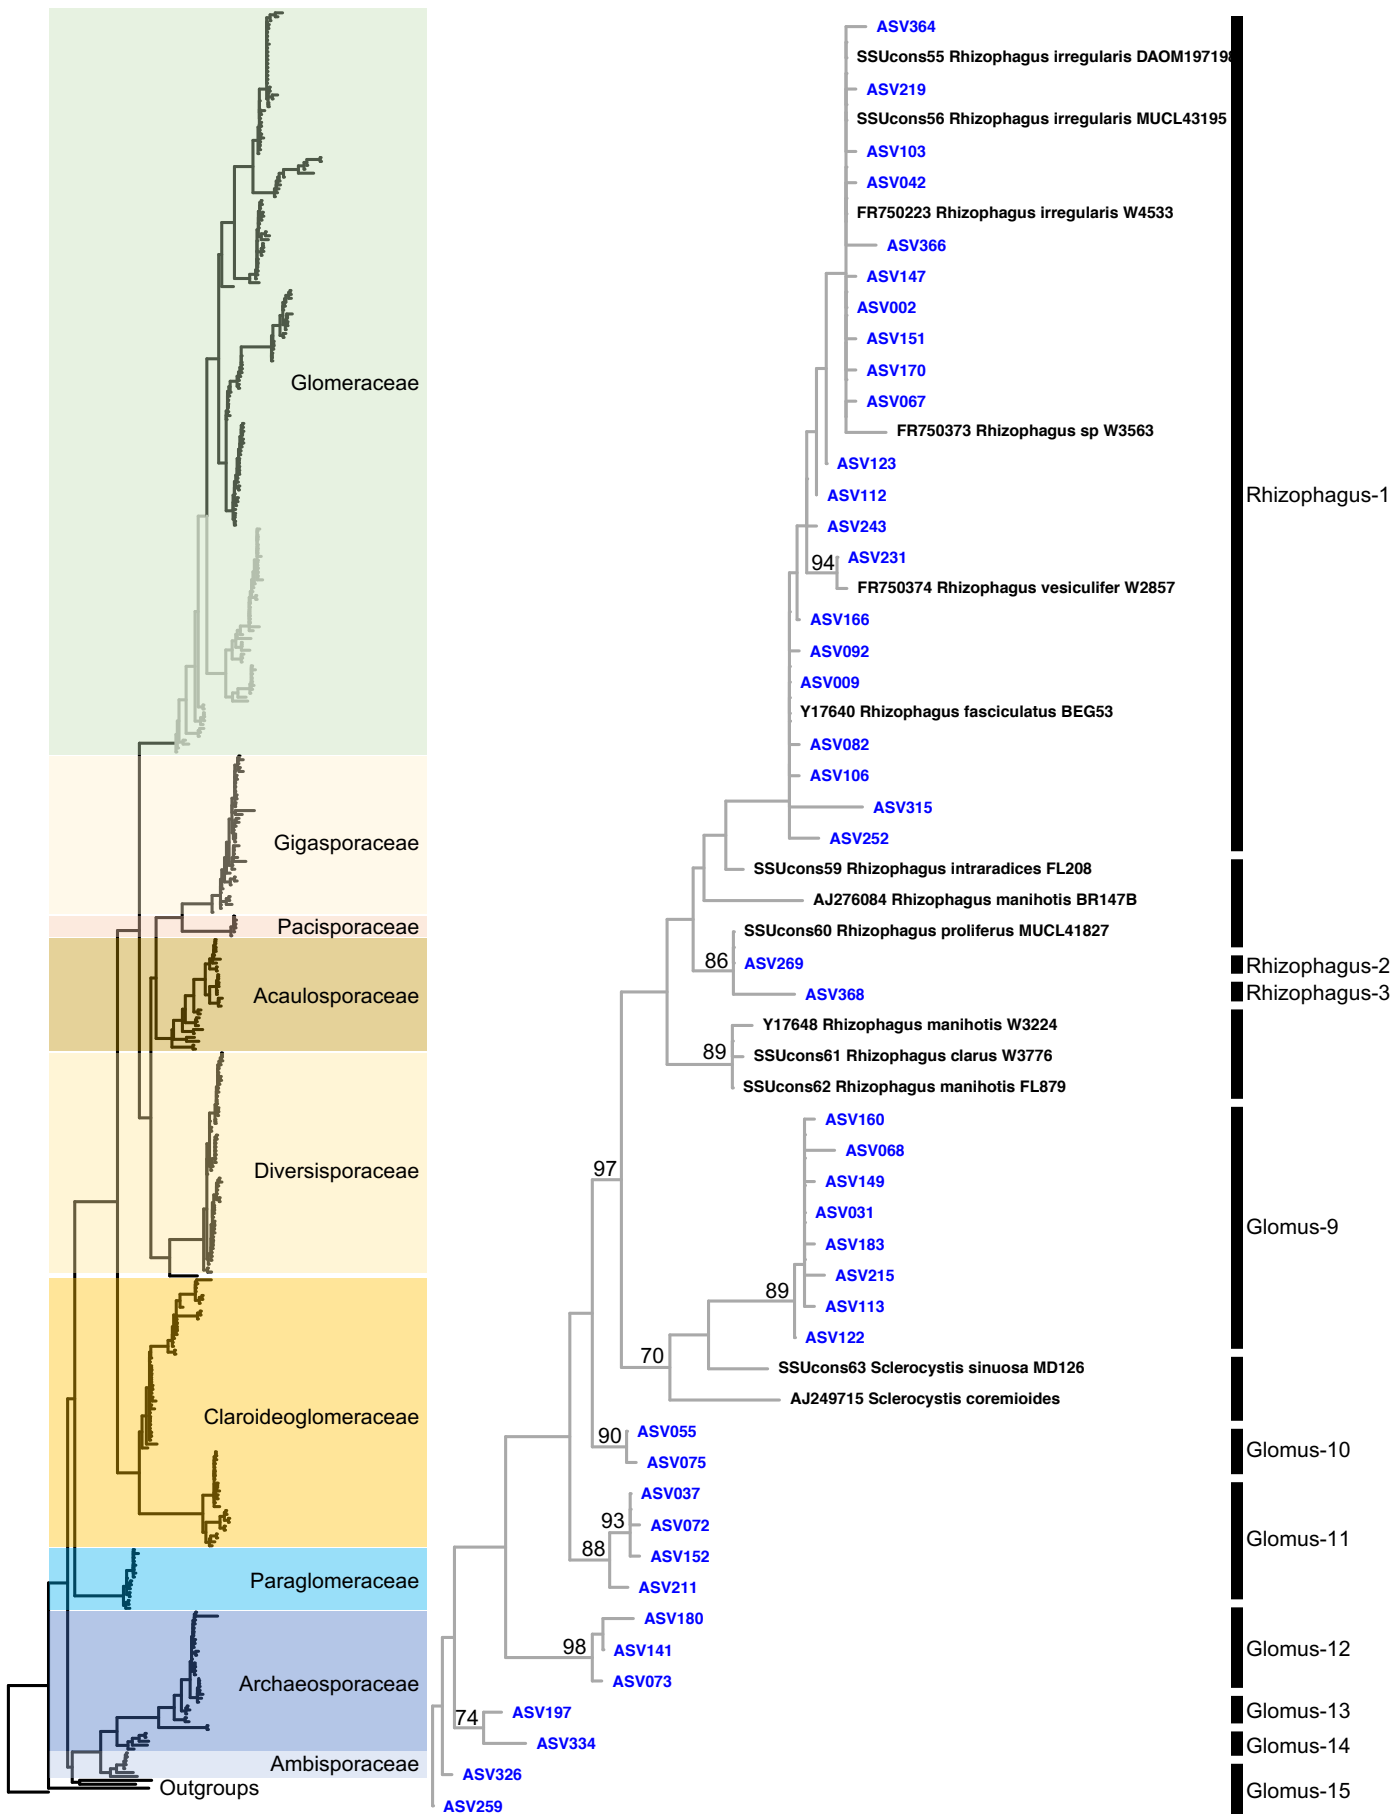

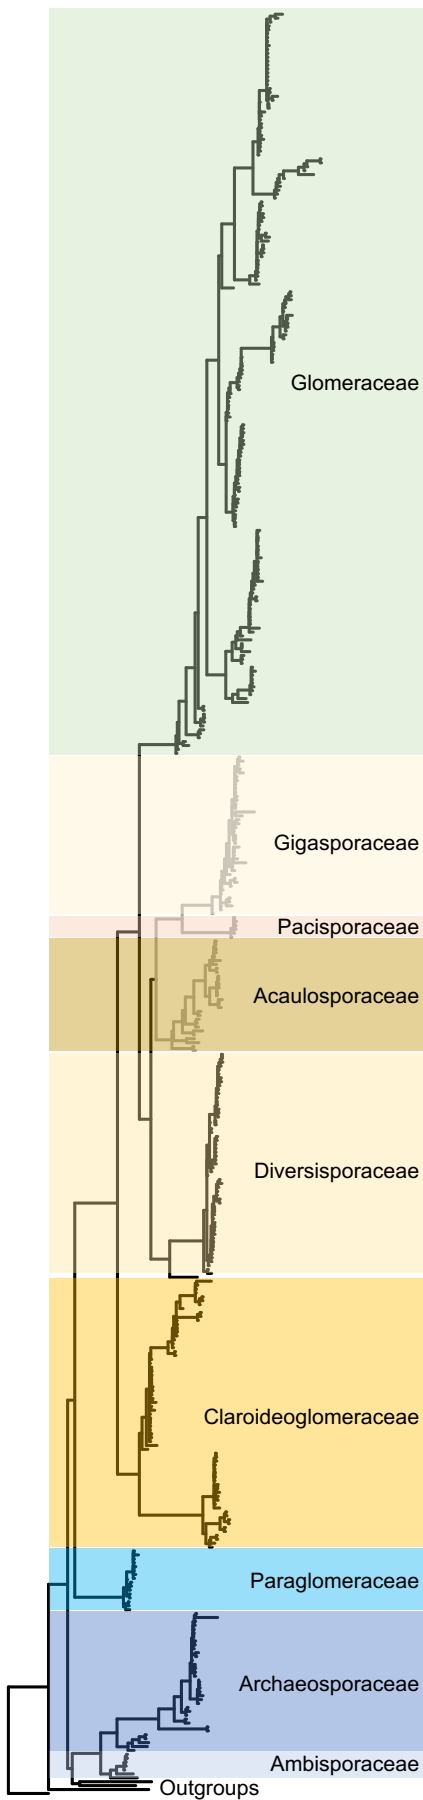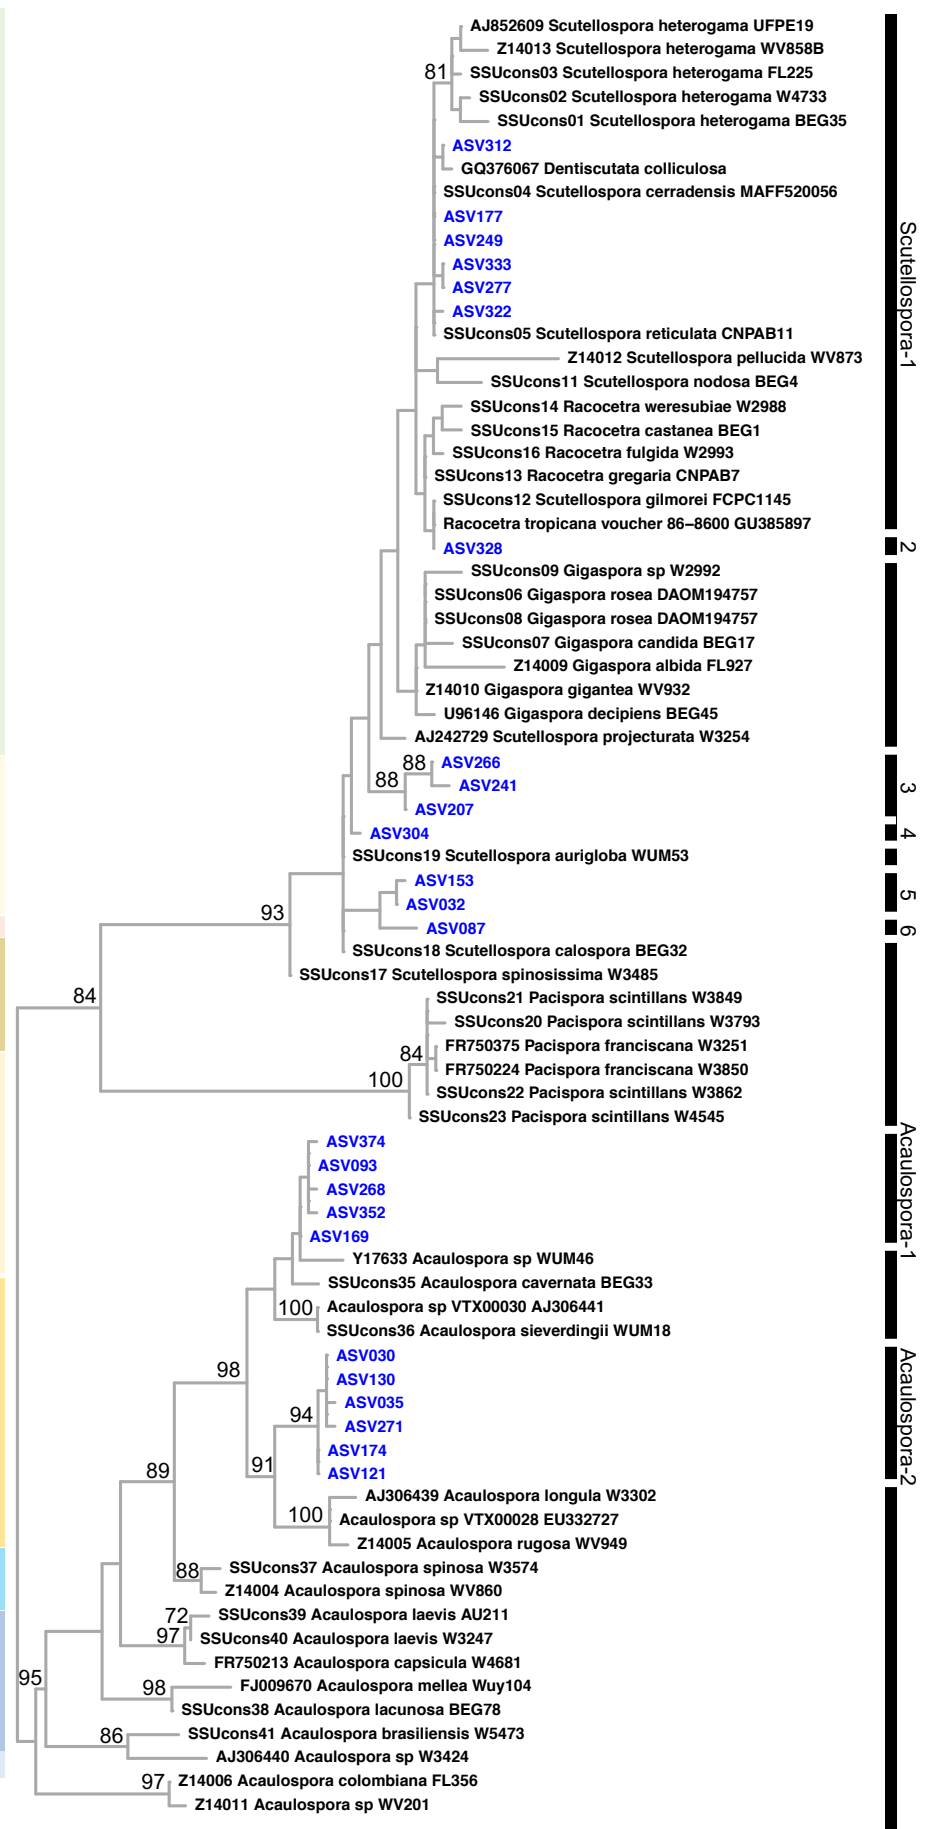

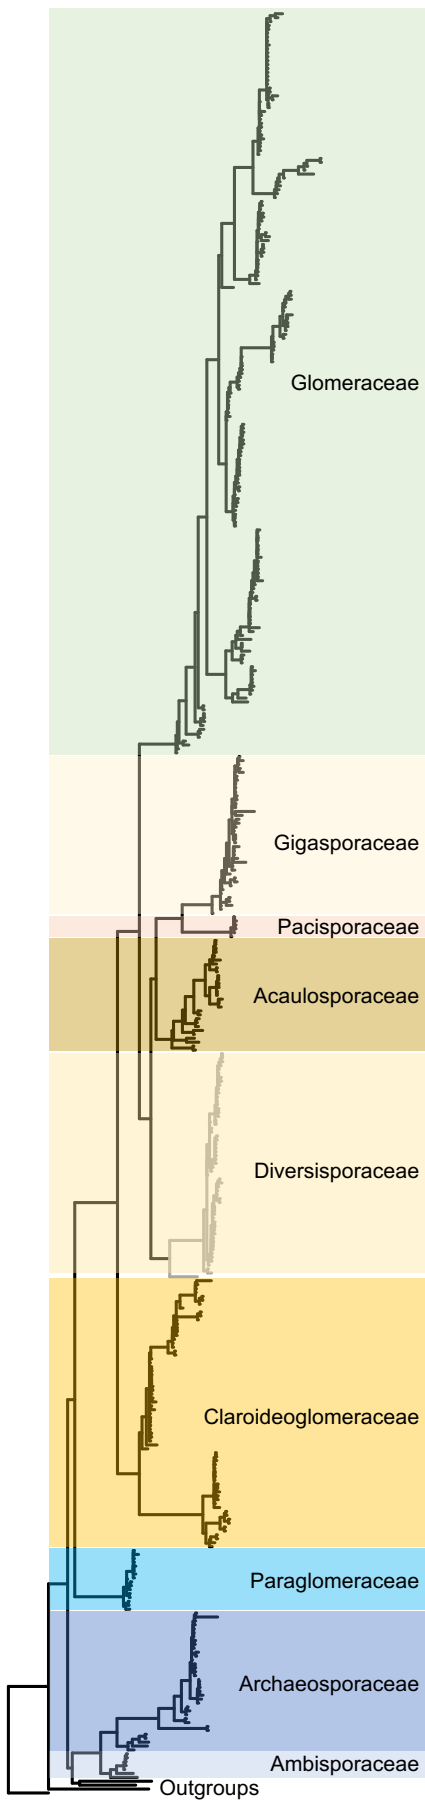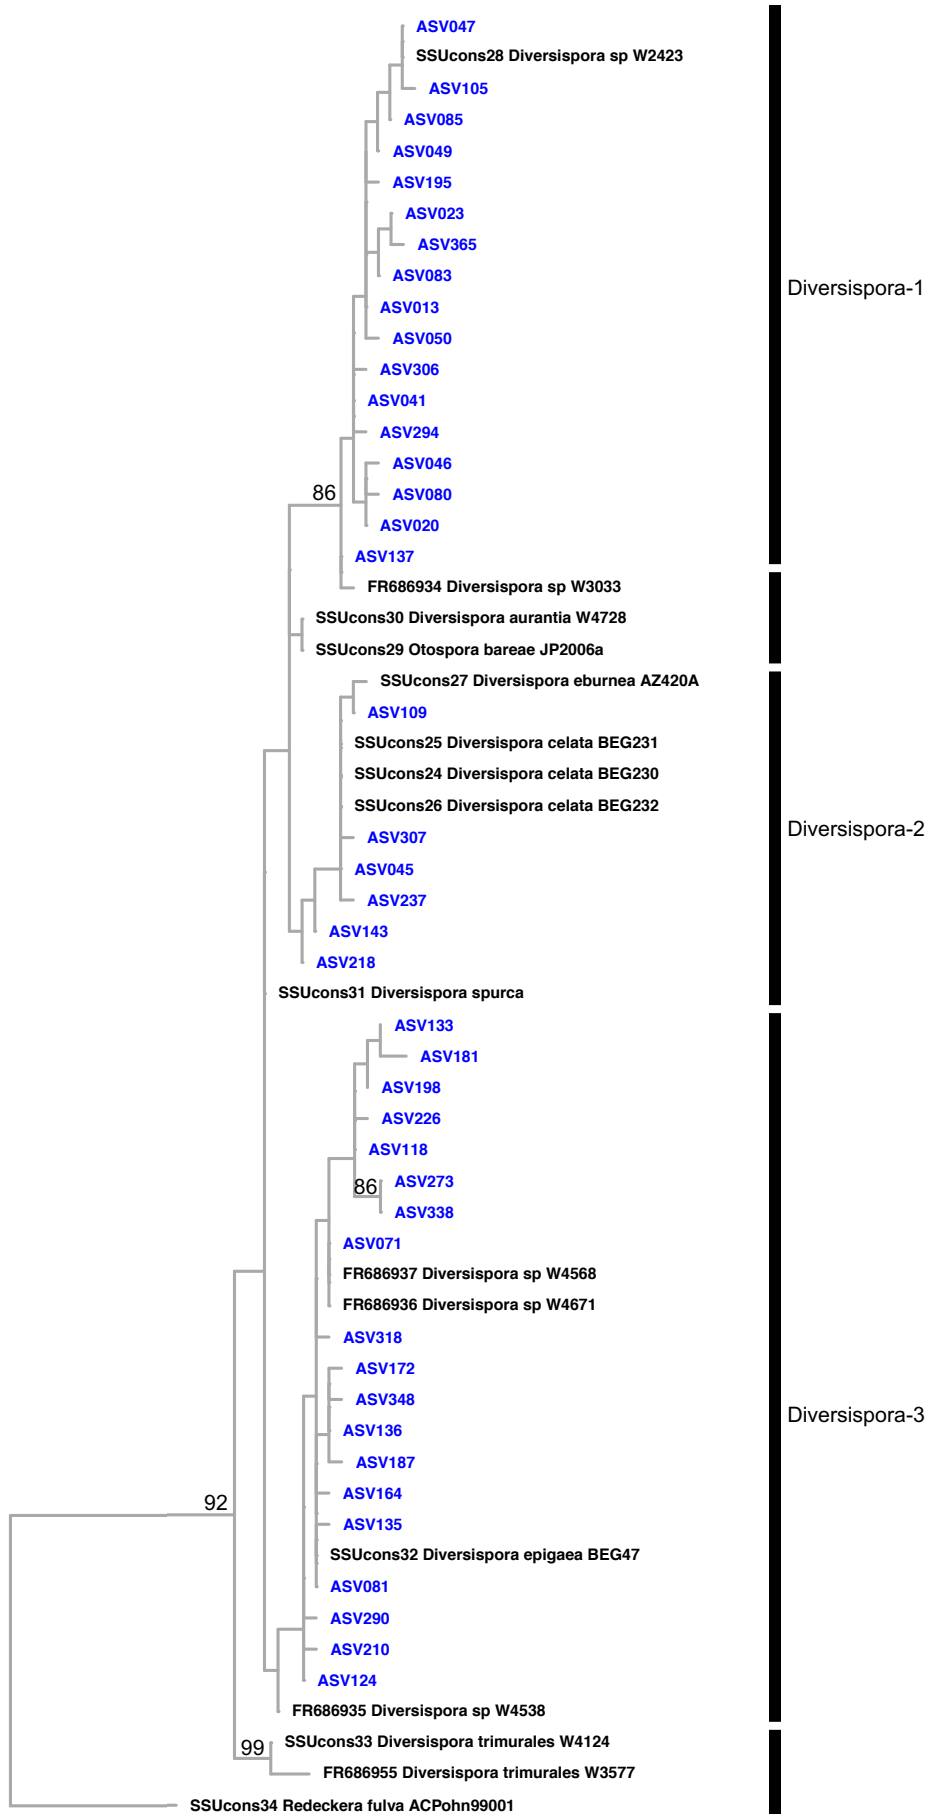

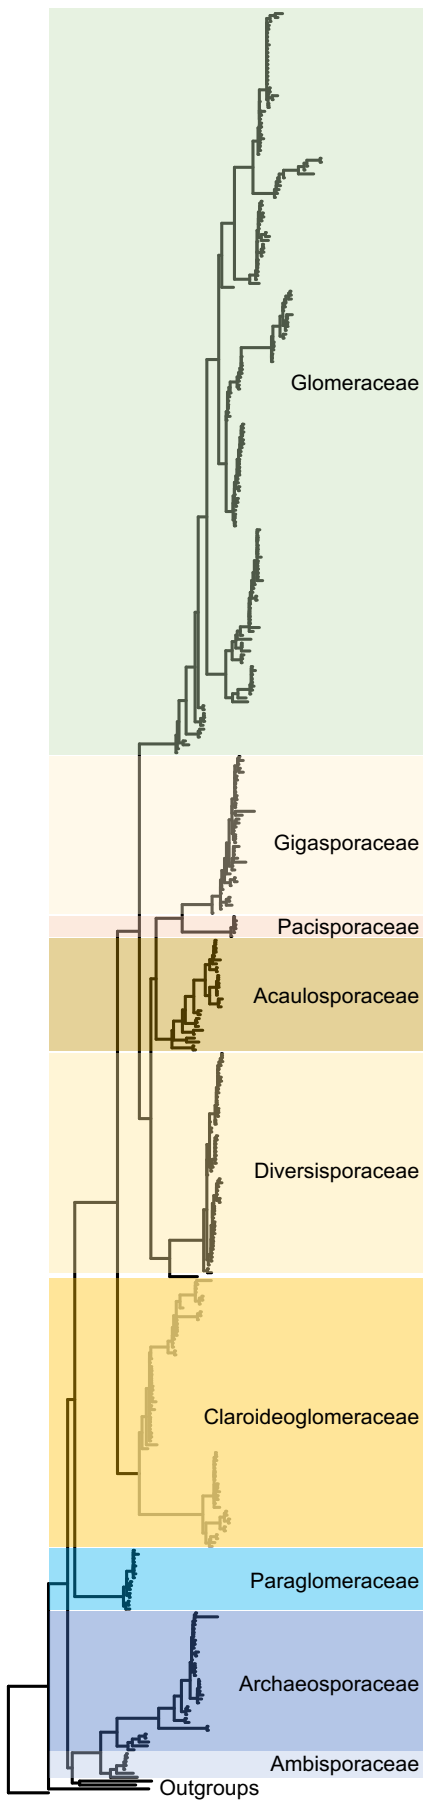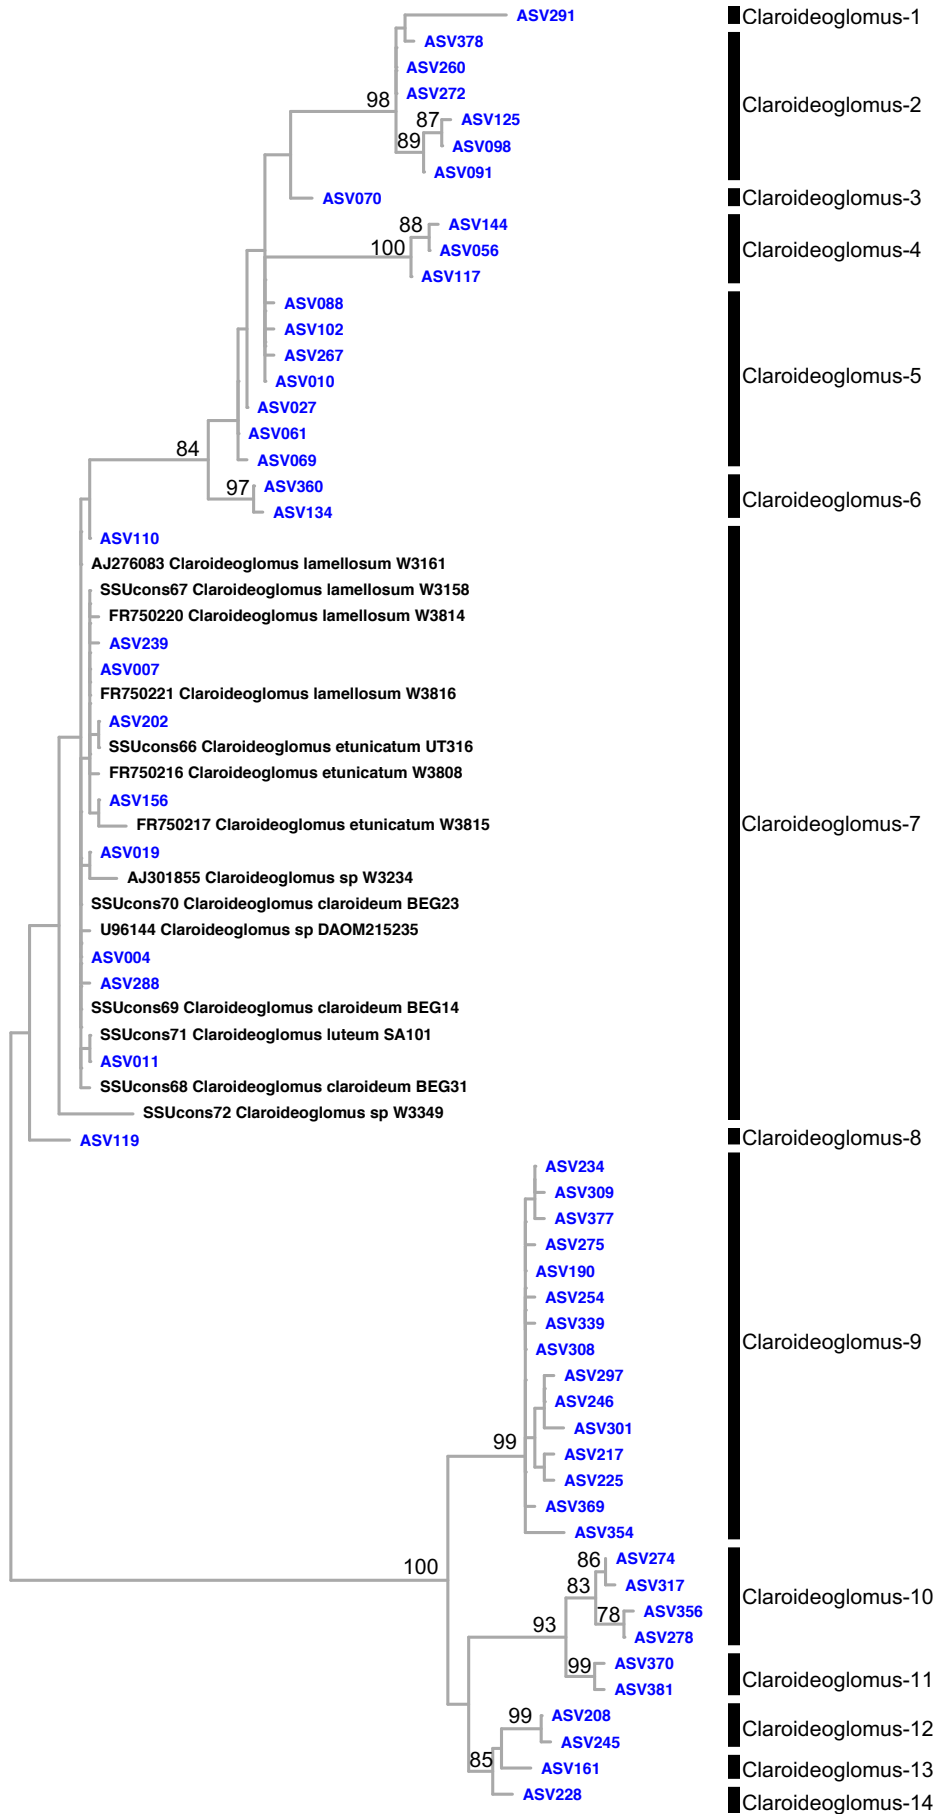

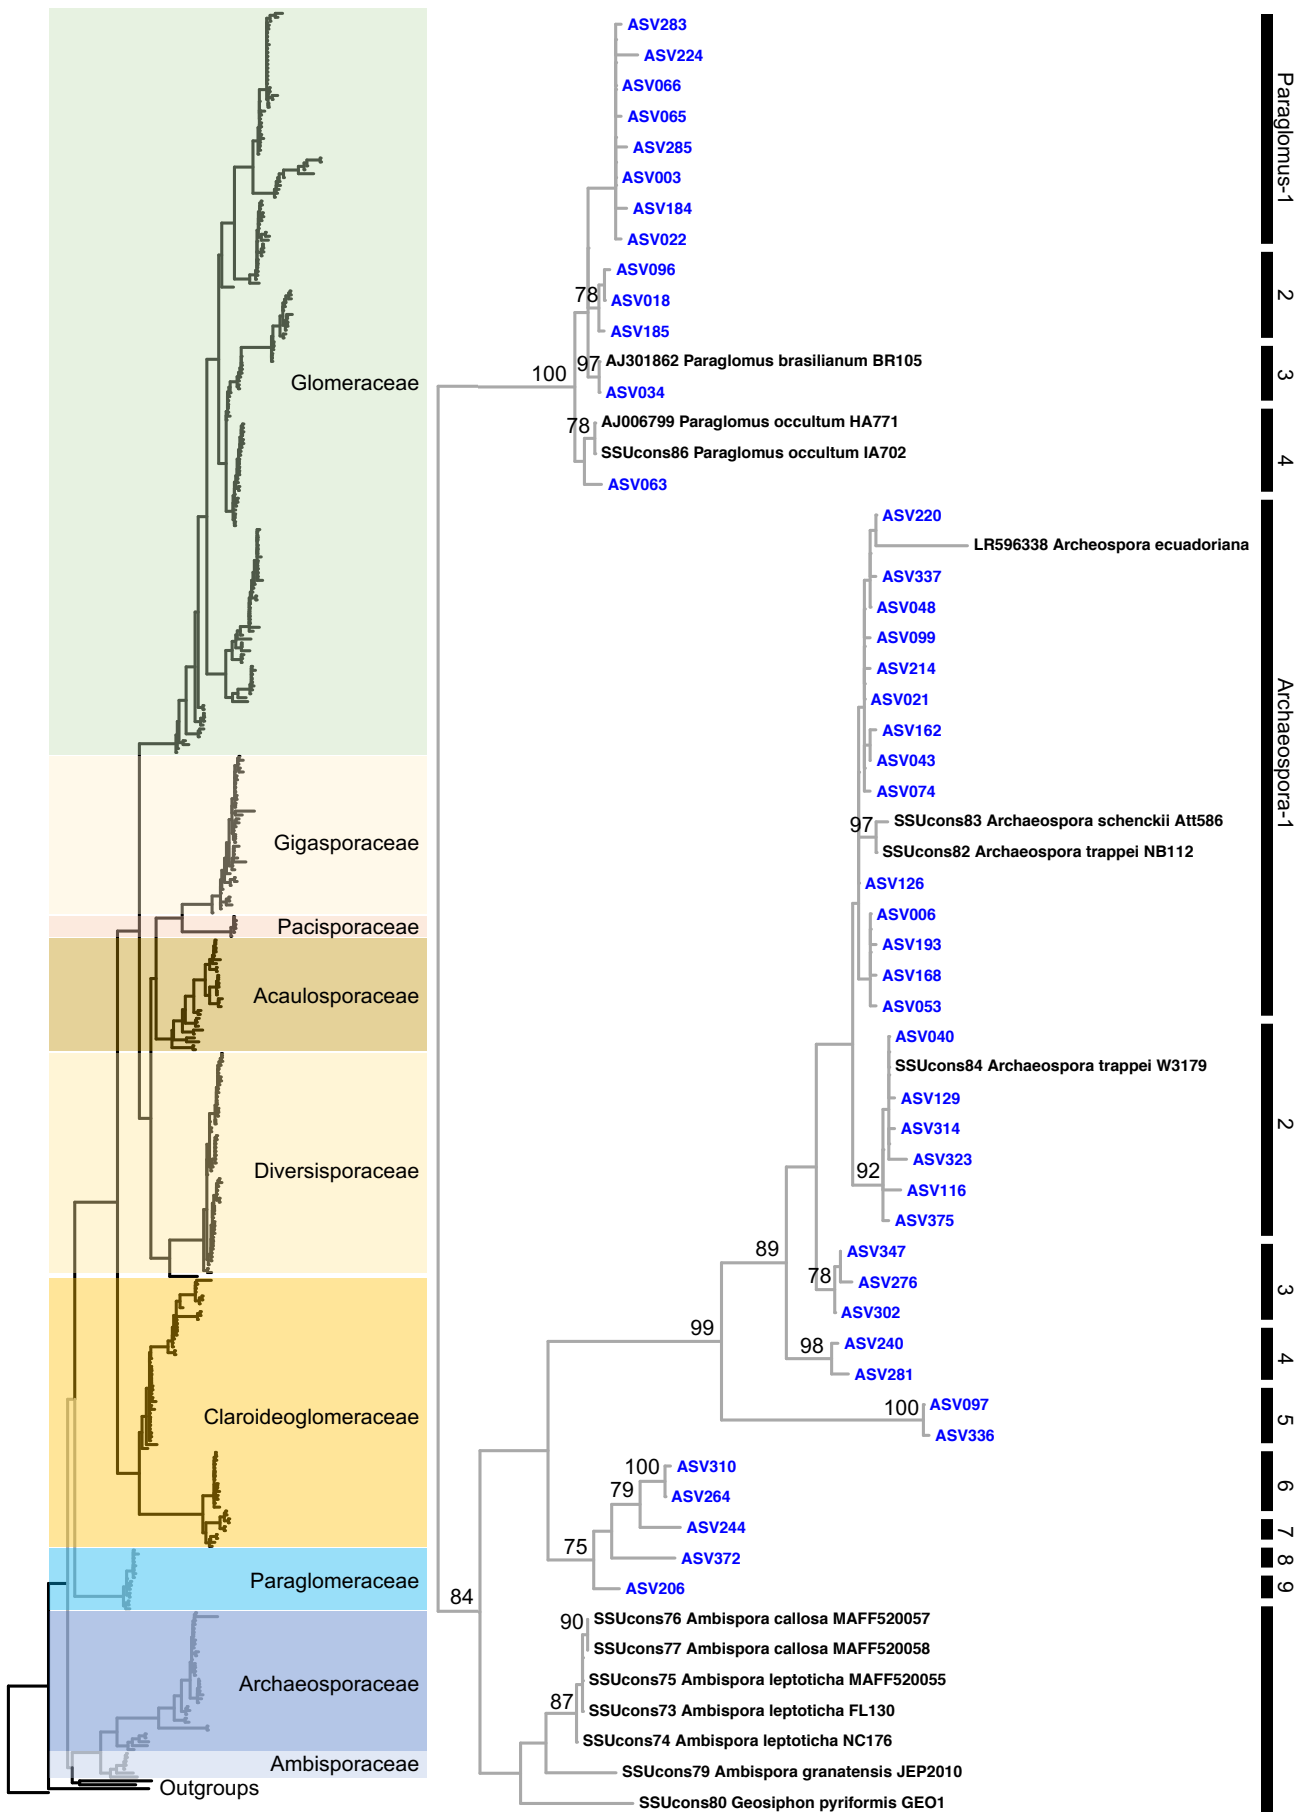

**Figure S3.** RAxML phylogeny showing the taxonomic assignment of each amplicon sequence variant (ASV, shown in blue) to the family level (left) and genus level (right). Phylogenetic trees on the right side represent the clades coloured in grey in the phylogenetic tree on the left side. Only bootstrap values  $> 70$  are shown. Within genus phylotypes have been determined using a clustering threshold of 99%.
